# Supplementary material for: Inhibition of Autophagy Potentiates Atorvastatin-Induced Apoptotic Cell Death in Human Bladder Cancer Cells in Vitro
Source: Int J Mol Sci. 2014 May 8;15(5):8106–21. doi: 10.3390/ijms15058106 (PMC4057722; doi:10.3390/ijms15058106)

## Supplementary Information

**Figure S1.** Western blot analysis of autophagy marker LC3-I and LC3-II in T24 cells treated with or without atorvastatin (Atorva) and mevalonate. We added 30  $\mu\text{M}$  of atorvastatin and 50  $\mu\text{M}$  of mevalonate into T24 cells for 24 h.

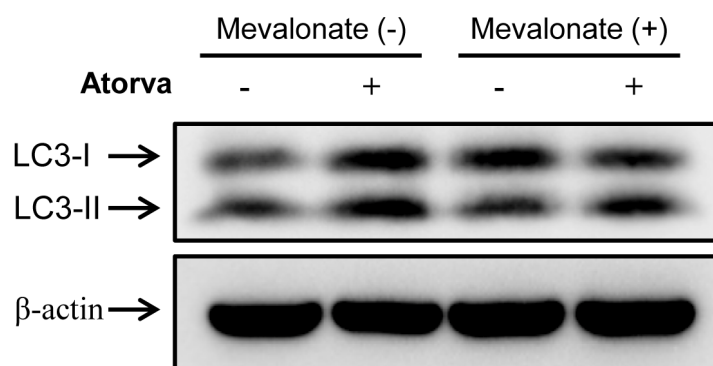

**Figure S2.** Western blot analysis of autophagy marker LC3-I and LC3-II in T24 cells treated with atorvastatin, bafilomycin A1 (BFA1) and both these agents. All drugs were treated at the concentration of 20  $\mu\text{M}$  for 24 h.

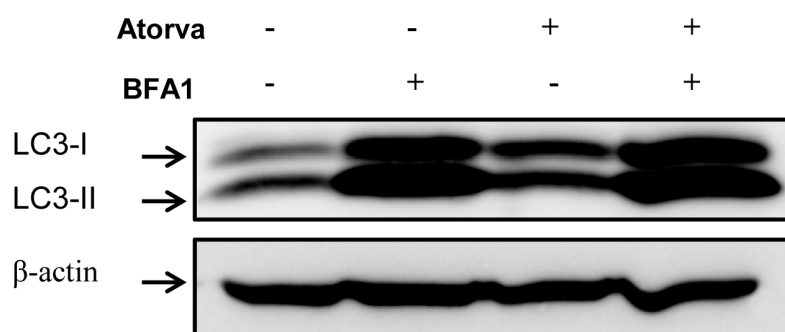

Supplement: Supplementary file 1 [file ijms-15-08106-s001.pdf]
